# Supplementary material for: 3D zinc@carbon fiber composite framework anode for aqueous Zn–MnO2 batteries
Source: Royal Society of Chemistry journal article supplement (doi:10.1039/c8ra03226b), 2018-01-01
Supplement: c8ra03226b1.pdf [file c8ra03226b1.pdf]

## Electronic Supplementary Information (ESI)

### **3D Zinc@Carbon fibers composite framework anode for aqueous Zn-MnO<sub>2</sub> batteries**

Wei Dong<sup>a,b</sup>, Ji-Lei Shi<sup>a,b</sup>, Tai-Shan Wang<sup>a,b</sup>, Ya-Xia Yin<sup>a,b</sup>, Chun-Ru Wang<sup>\*a,b</sup>, Yu-Guo Guo<sup>\*a,b</sup>

<sup>a</sup> CAS Key Laboratory of Molecular Nanostructure and Nanotechnology, CAS Research/Education, Center for Excellence in Molecular Sciences, Institute of Chemistry, Chinese Academy of Sciences (CAS), Beijing 100190, P. R. China

<sup>b</sup>University of Chinese Academy of Sciences, Beijing 100049, P. R. China

\* Corresponding authors.

E-mail: crwang@iccas.ac.cn; ygguo@iccas.ac.cn

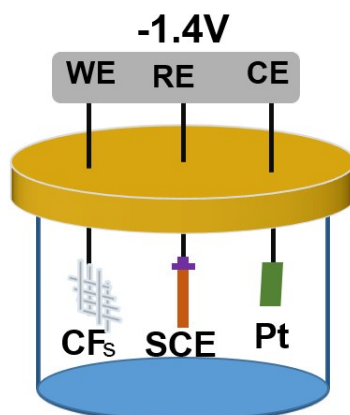

**Fig. s1** Schematic illustration for preparation of Zn@CFs electrode in a three-electrode glass under -1.4V vs. SCE.

The area of hydrophilic carbon clothes was 4 cm<sup>2</sup> (2cm\*2cm, shanghai hesen, 99%) as working electrode, a Pt foil (alfa, 99%) as counter electrode, a SCE as the reference electrode. The electrodeposition voltage was under -1.4 V (vs. SCE) in a solution containing 0.2 mol L<sup>-1</sup> ZnSO<sub>4</sub> and 0.5 mol L<sup>-1</sup> Na<sub>3</sub>C<sub>6</sub>H<sub>5</sub>O<sub>7</sub>·H<sub>2</sub>O for 0.5 h. Before deposition, the carbon clothes were immersed in the solution for 10 mins to maintain a better infiltration and eliminate the bubbles.

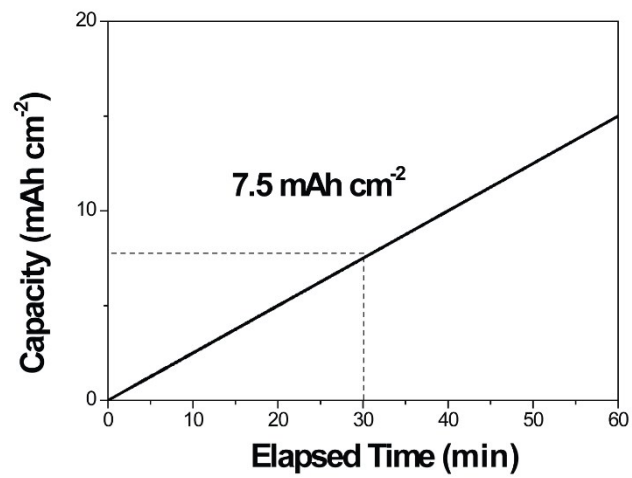

**Fig. s2** Deposition capacity curve over time (min)

After electrodeposition for 30 mins under -1.4 V (vs. SCE), the capacity reach to 7.5 mA h cm<sup>-2</sup> and the mass load of Zn was about 9.5 mg cm<sup>-2</sup> (after 30 mins electrodeposition).

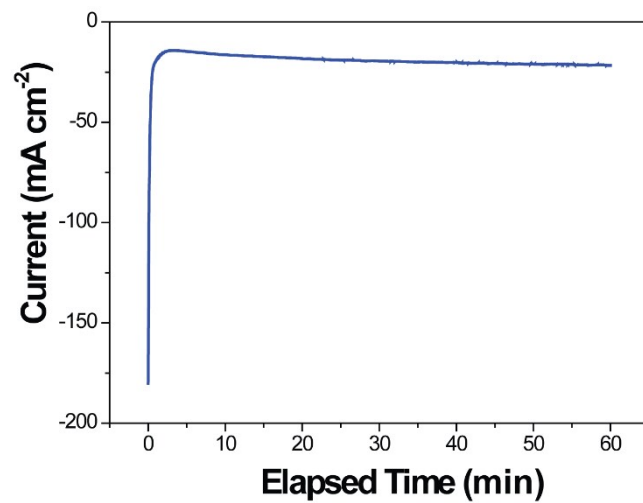

**Fig. s3** Deposition current curve over time (min)

Through constant voltage (-1.4V) electrodeposition process, with the increment Zn amount, the electrical resistance of Zn@CFs anode decreased which was reflected by increment of deposition current.

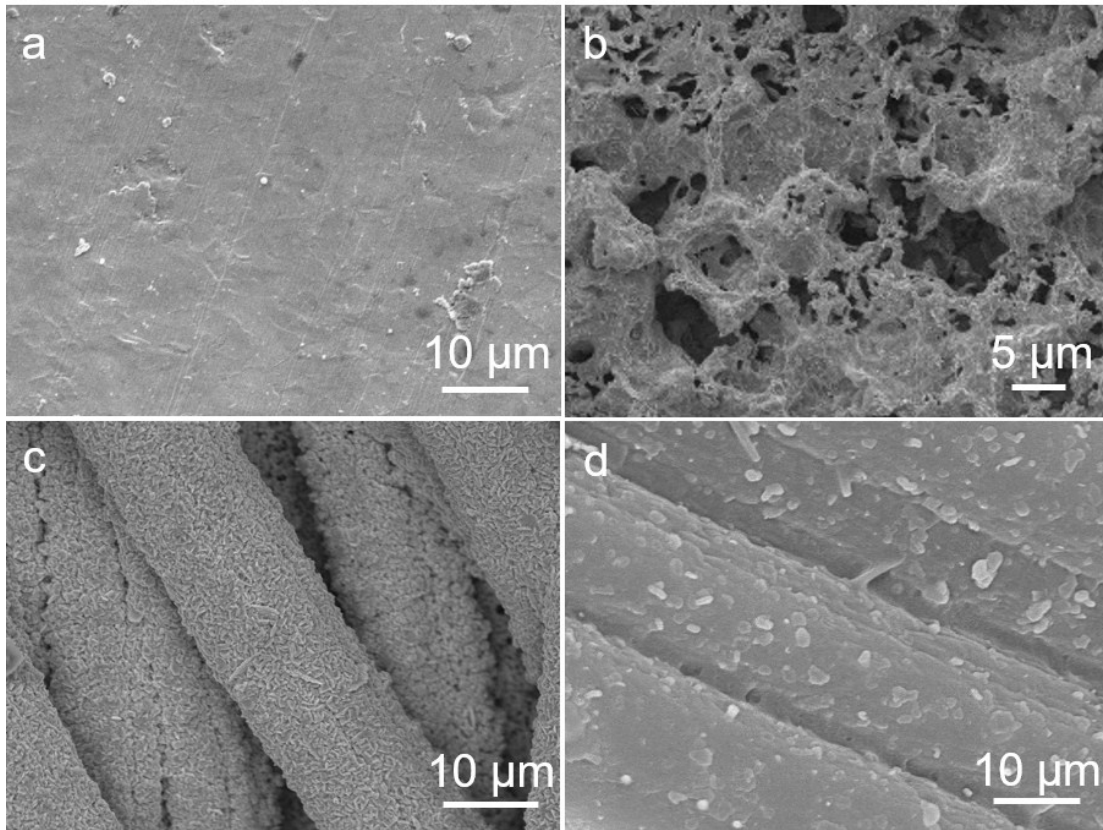

**Fig. s4** the morphology changes of a commercialized Zinc plate anode before cycling test (a) and the SEM image of Zn dendrite after cycling (b). The morphology changes of Zn@CFs anode before (c) and after (d) cycling test.

Table S1 Comparison of the as-obtained Zn@CFs | $\alpha$ -MnO<sub>2</sub> aqueous battery with previous reported Zn<sup>2+</sup> ion aqueous battery systems.

| Life span | Cathode material           | Initial discharge capacity                        | Capacity Retention | Electrolyte                                                       | Highest rate Current                 | Energy density (W h kg <sup>-1</sup> ) | Power density (kW kg <sup>-1</sup> ) | Reference                                    |
|-----------|----------------------------|---------------------------------------------------|--------------------|-------------------------------------------------------------------|--------------------------------------|----------------------------------------|--------------------------------------|----------------------------------------------|
| 140       | $\alpha$ -MnO <sub>2</sub> | 239.4 mA h g <sup>-1</sup> (1 C)                  | 86.80%             | 2 M ZnSO <sub>4</sub> and 0.1 M MnSO <sub>4</sub>                 | 1540 (5 C)                           | 392.2                                  | 2.2                                  | <b>This work</b>                             |
| 150       | Prussian Blue              | 81 mA h g <sup>-1</sup> (100 mA g <sup>-1</sup> ) | 85%                | 0.5 M Na <sub>2</sub> SO <sub>4</sub> and 0.5 M ZnSO <sub>4</sub> | 500 mA g <sup>-1</sup>               | 97.2                                   | 0.6                                  | Electrochim. Acta, 2017, 244, 172–177        |
| 125       | $\delta$ -MnO <sub>2</sub> | 123 mA h g <sup>-1</sup> (C/25)                   | 49%                | 0.5 M AN–Zn (TFSI) <sub>2</sub> electrolyte                       | 1 C (208 mA g <sup>-1</sup> )        | 116.9                                  | 0.21                                 | Chem. Mater., 2017, 29, 4874–4884            |
| 80        | $\alpha$ -MnO <sub>2</sub> | 171.5 mA h g <sup>-1</sup>                        | 85.60%             | 1 M ZnSO <sub>4</sub>                                             | 200 mA g <sup>-1</sup> (about 1.2 C) | 248.7                                  | 0.29                                 | J. Electrochem. Soc., 2015, 162, A1439–A1444 |
| 60        | MnO <sub>2</sub>           | 220 mA h g <sup>-1</sup>                          | 40.90%             | 25 wt% KOH solution                                               | C/20(15.5 mA h g <sup>-1</sup> )     | 291.5                                  | 0.02                                 | Electrochem. Commun., 2017, 81, 136–140      |
